# Supplementary material
Source: HighWire-hosted journal article supplement (https://jnm.snmjournals.org/highwire/filestream/95400/field_highwire_adjunct_files/0/210518_Supplemental_Data.pdf)
Supplement: 210518_Supplemental_Data.pdf [file 210518_Supplemental_Data.pdf]

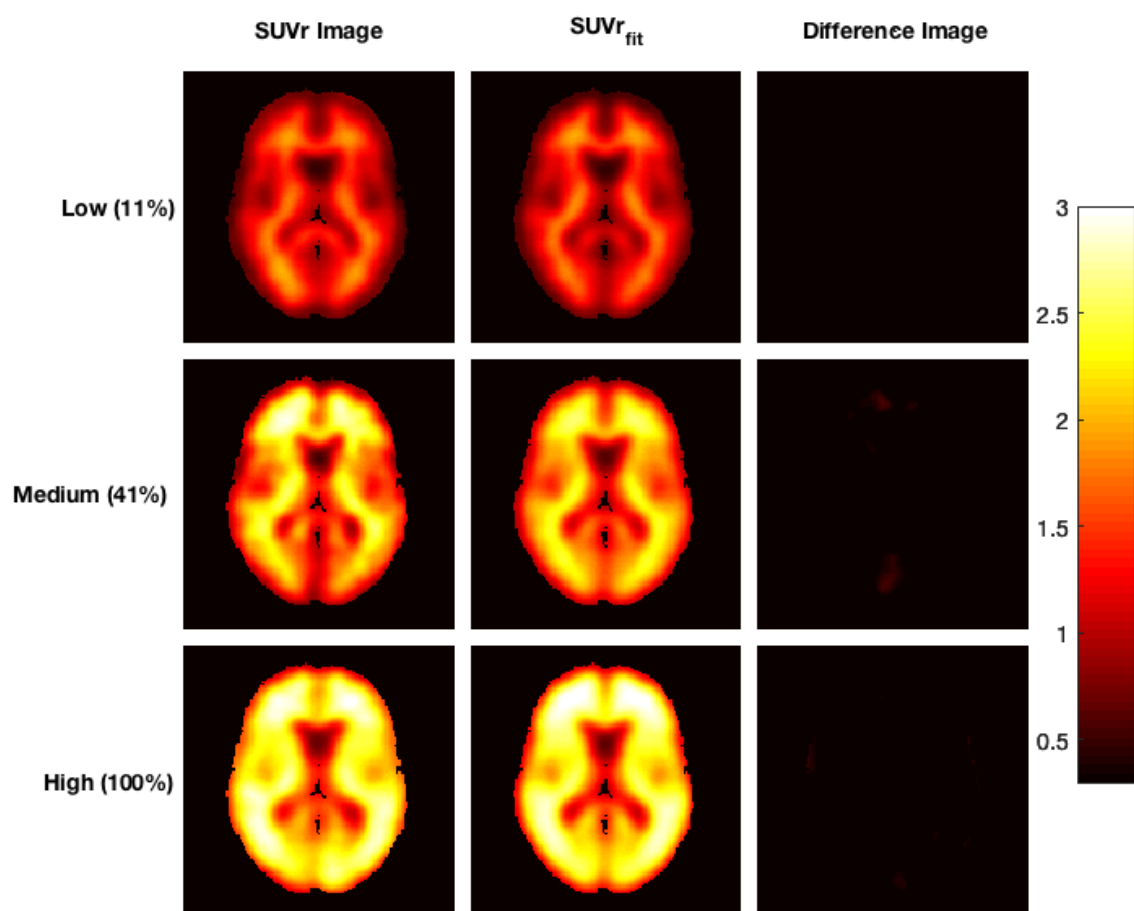

**Supplemental Figure 1:** A figure showing fitting of  $SUVR_{fit}$  images for different levels of amyloid. There was no relation between the quality of the fitting and the calculated  $A\beta_L$ .
